# Supplementary material for: The effect of the 4-amino functionality on the photophysical and DNA binding properties of alkyl-pyridinium derived 1,8-naphthalimides
Source: Royal Society of Chemistry journal article supplement (doi:10.1039/c3ob40370j), 2013-01-01
Supplement: c3ob40370j.pdf [file c3ob40370j.pdf]

# The effect of the 4-amino functionality on the photophysical and DNA binding properties of alkyl-pyridinium derived 1,8-naphthalimides

Swagata Banerjee, Jonathan A. Kitchen, Thorfinnur Gunnlaugsson\* and John M. Kelly\*

Electronic Supplementary Information (ESI)

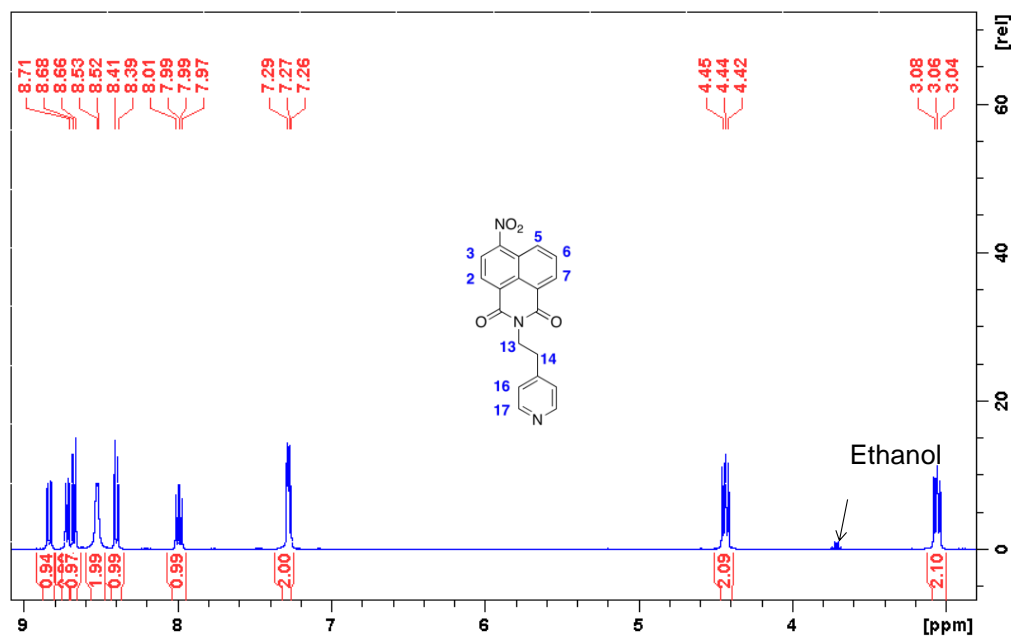

Figure ESI 1A:  $^1\text{H-NMR}$  of **5** in  $\text{CDCl}_3$  (400 MHz).

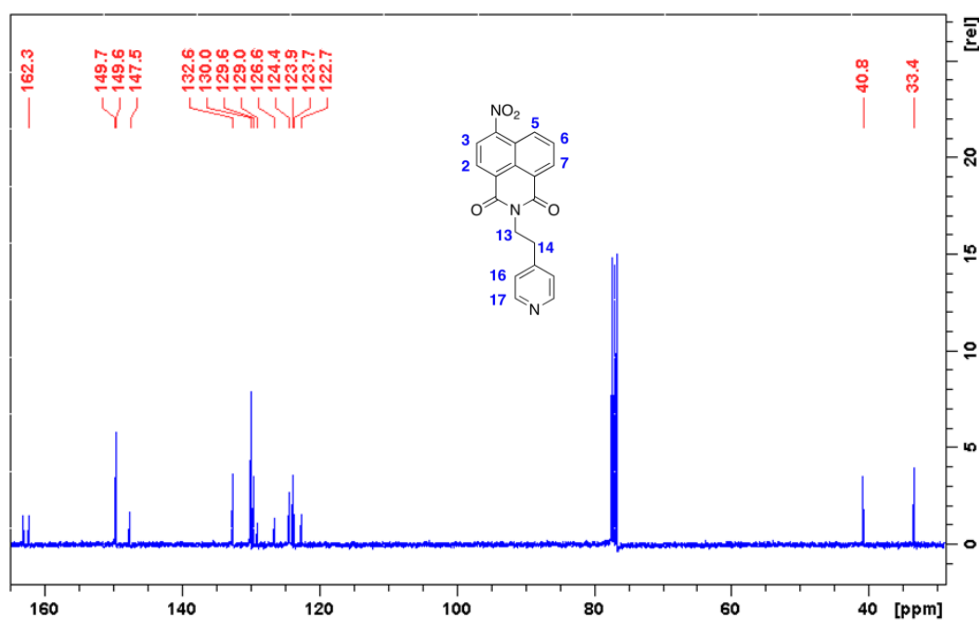

Figure ESI 1B:  $^{13}\text{C-NMR}$  of **5** in  $\text{CDCl}_3$  (100 MHz).

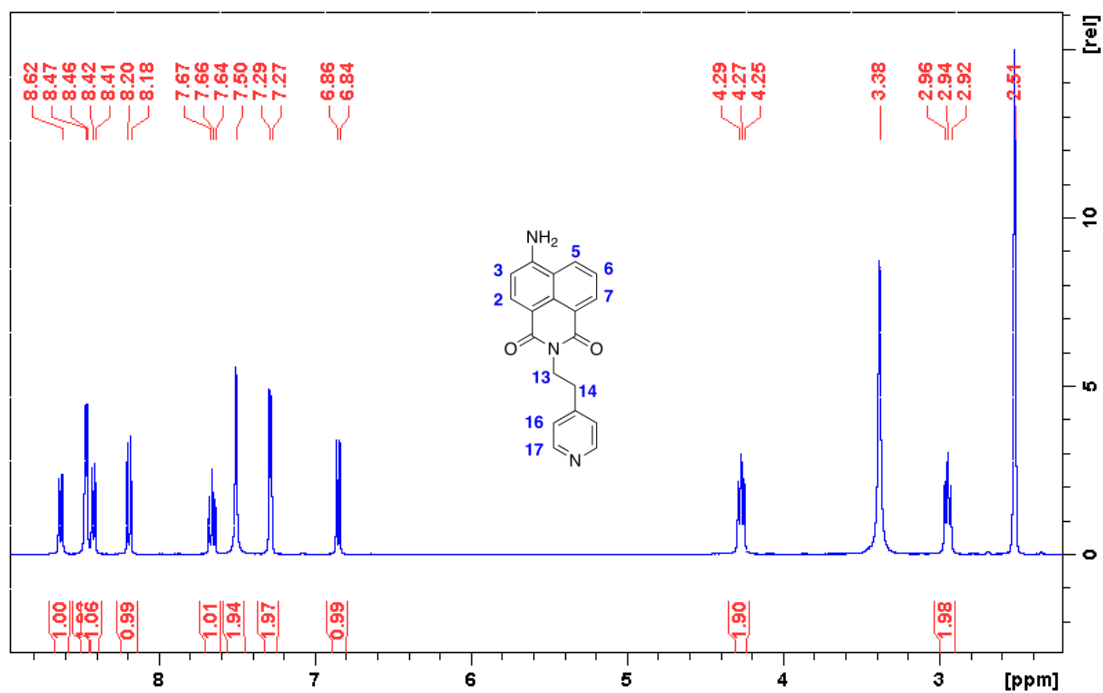

Figure ESI 1c:  $^1\text{H-NMR}$  of **4** in  $\text{DMSO-d}_6$  (400 MHz).

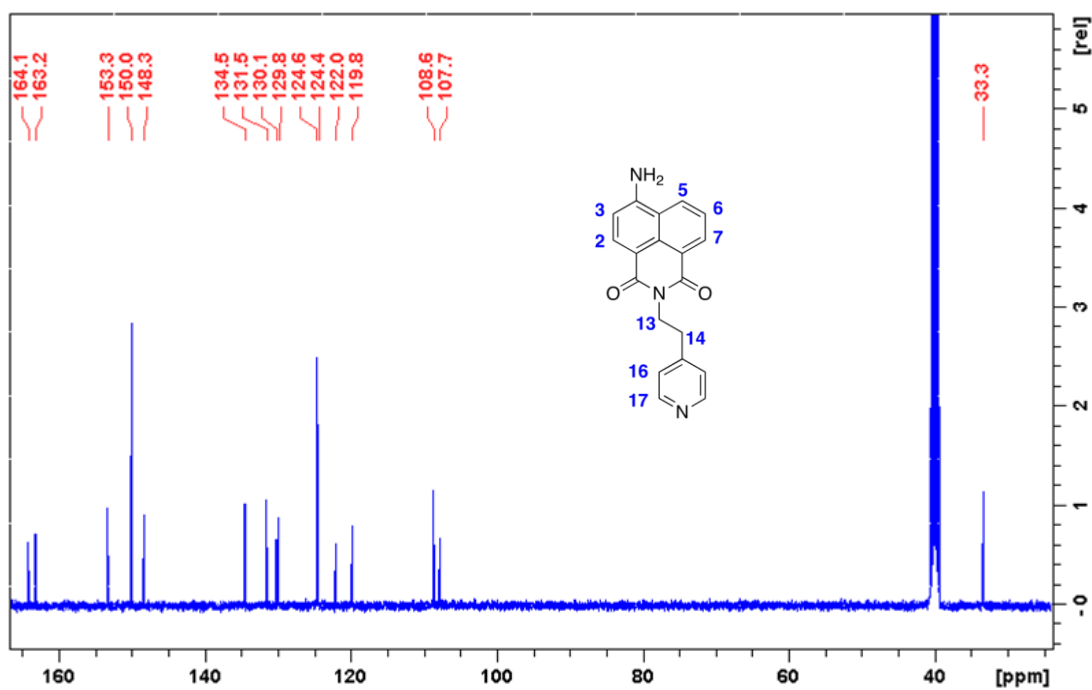

Figure ESI 1d:  $^{13}\text{C-NMR}$  of **4** in  $\text{DMSO-d}_6$  (100 MHz).

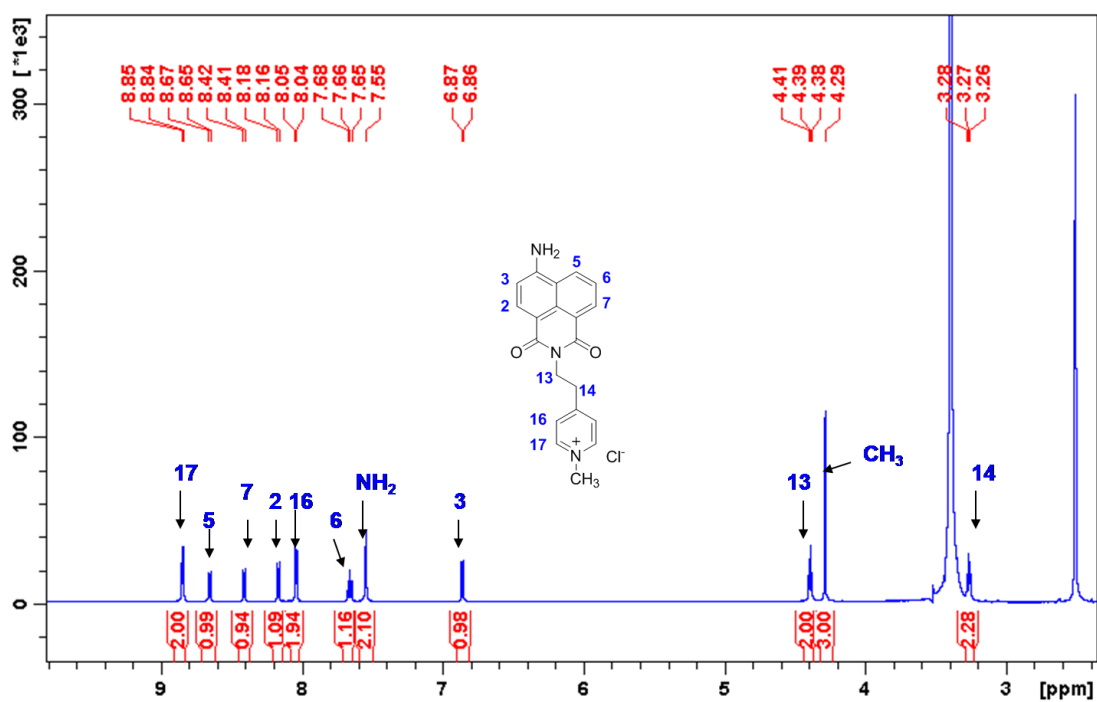

Figure ESI 1e: <sup>1</sup>H-NMR of **2** in DMSO-d<sub>6</sub> (600 MHz).

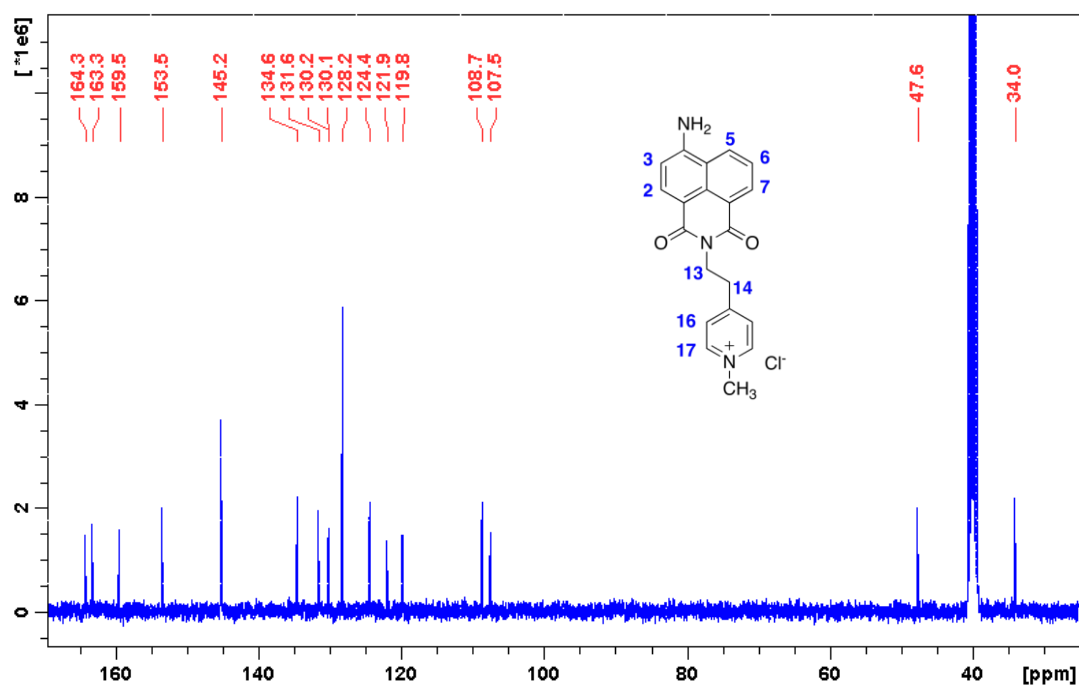

Figure ESI 1f: <sup>13</sup>C-NMR of **2** in DMSO-d<sub>6</sub> (150 MHz).

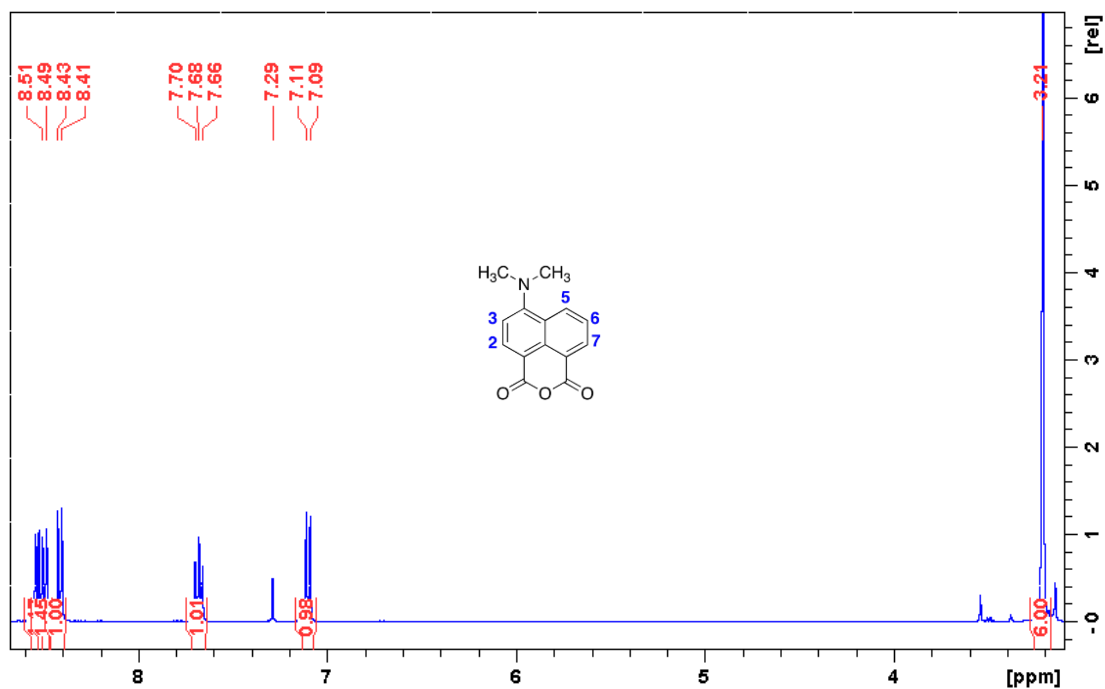

Figure ESI 2a:  $^1\text{H-NMR}$  of **7** in  $\text{CDCl}_3$  (400 MHz).

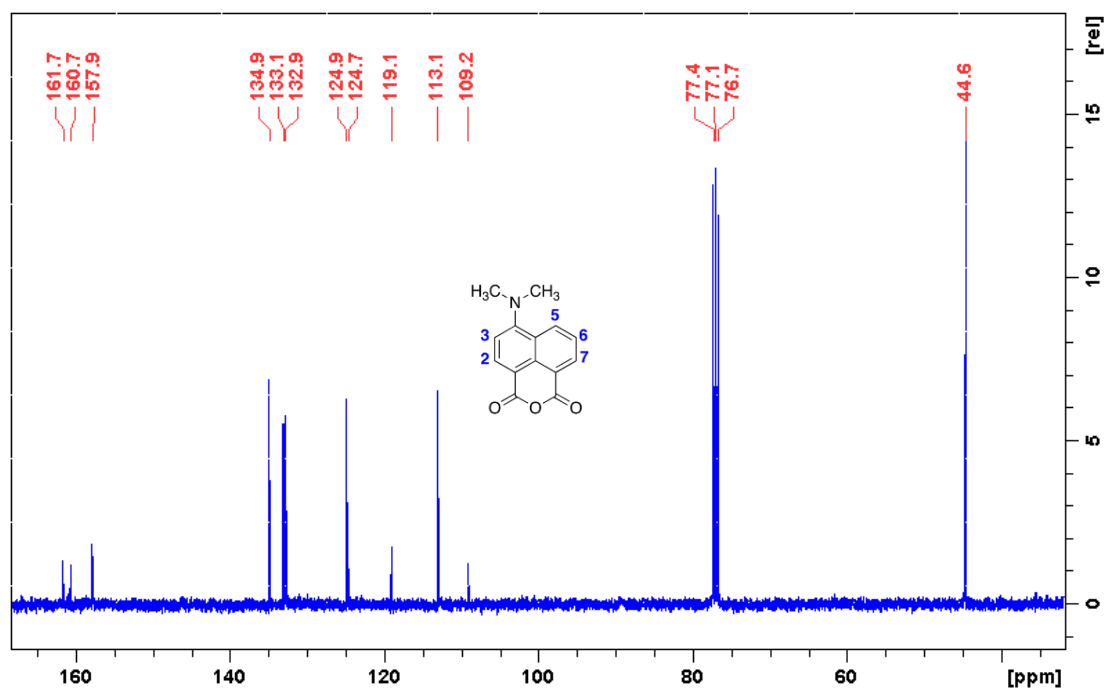

Figure ESI 2b:  $^{13}\text{C-NMR}$  of **7** in  $\text{CDCl}_3$  (100 MHz).

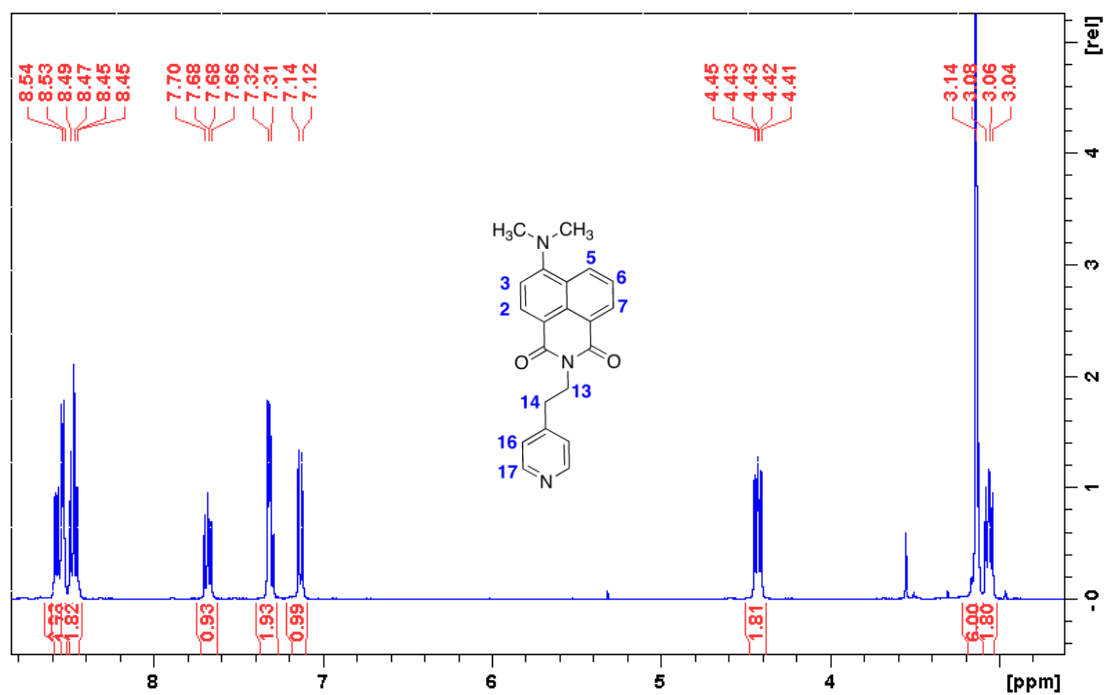

Figure ESI 2c: <sup>1</sup>H-NMR of **6** in CDCl<sub>3</sub> (400 MHz).

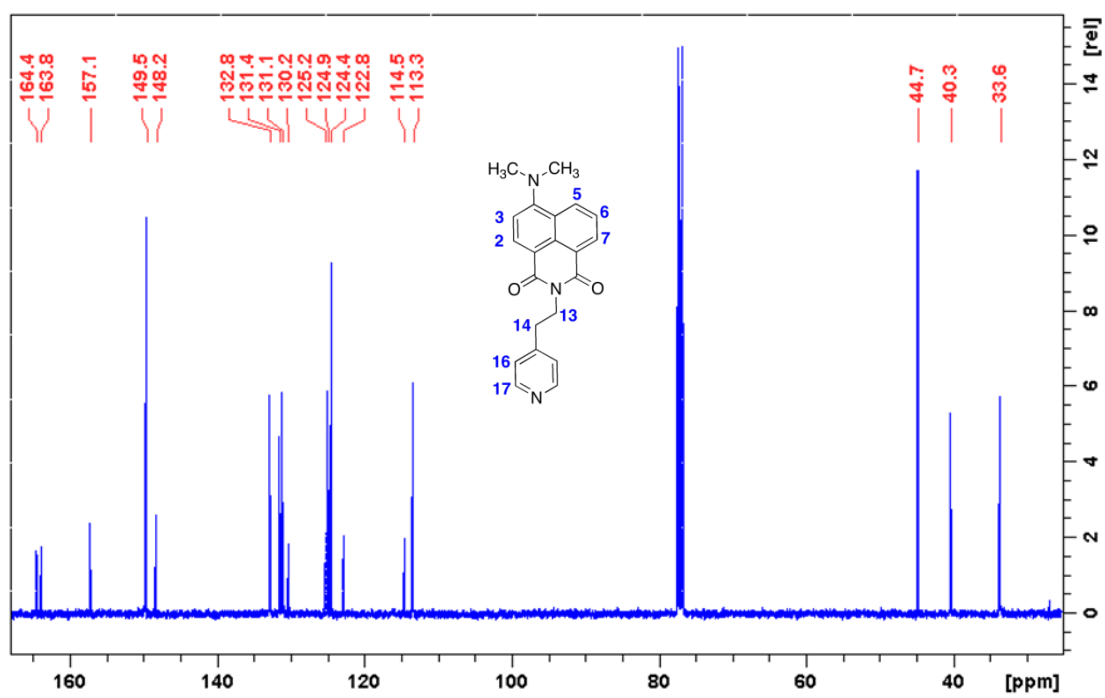

Figure ESI 2d: <sup>13</sup>C-NMR of **6** in CDCl<sub>3</sub> (100 MHz).

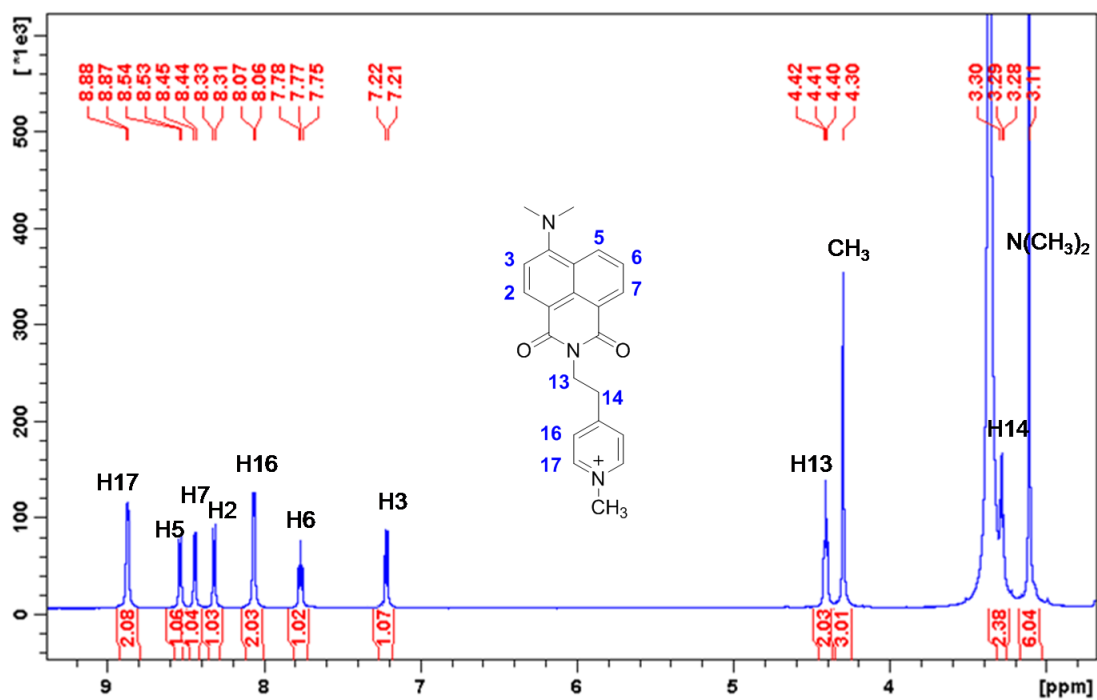

Figure ESI 2e: <sup>1</sup>H-NMR of **3** in DMSO-d<sub>6</sub> (600 MHz).

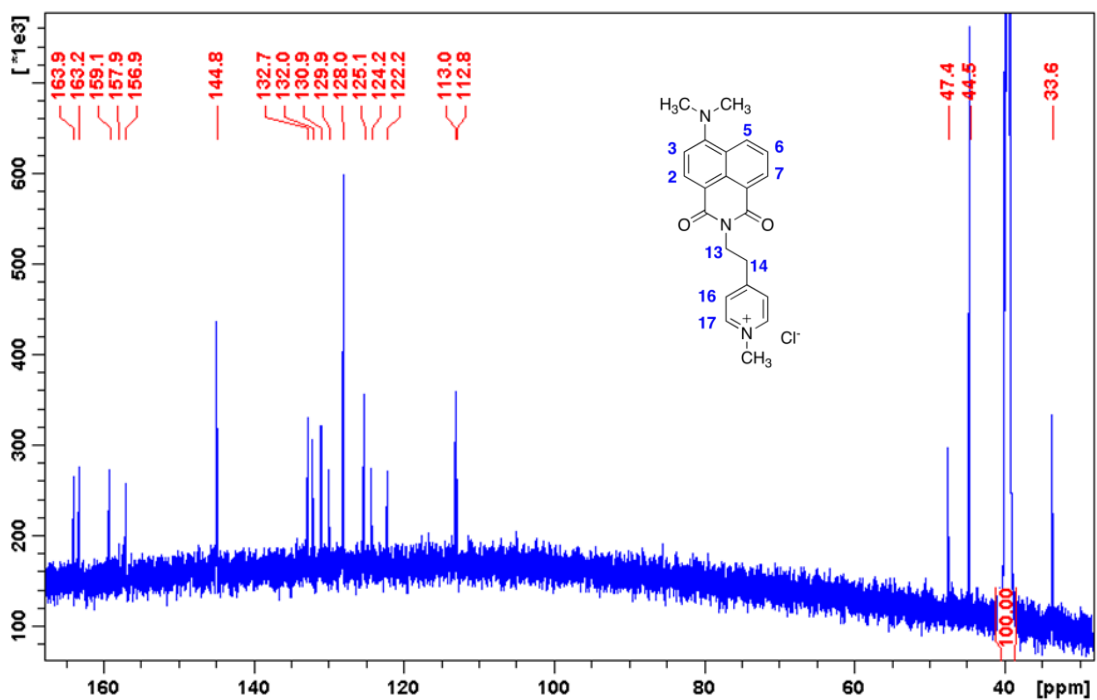

Figure ESI 2f: <sup>13</sup>C-NMR of **3** in DMSO-d<sub>6</sub> (150 MHz).

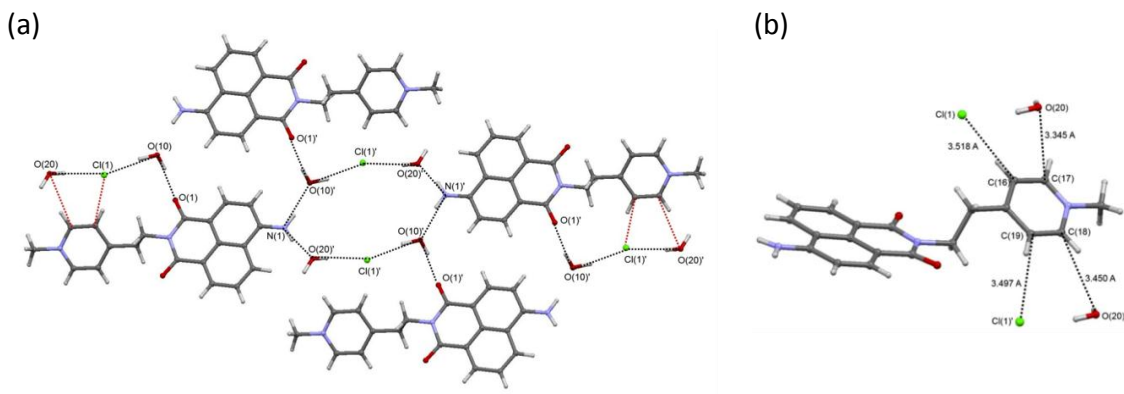

**Figure ESI 3:** (a) The packing of **2** showing the  $\pi$ - $\pi$  interactions (c) H-bonding network, where (.....) shows classical NH or OH hydrogen bonding interactions and (.....) denotes non-classical CH based hydrogen bonding, (b) Demonstration of out of plane orientation of pyridyl ring in the solid- state structure of **2** due to non-classical H-bonding interactions

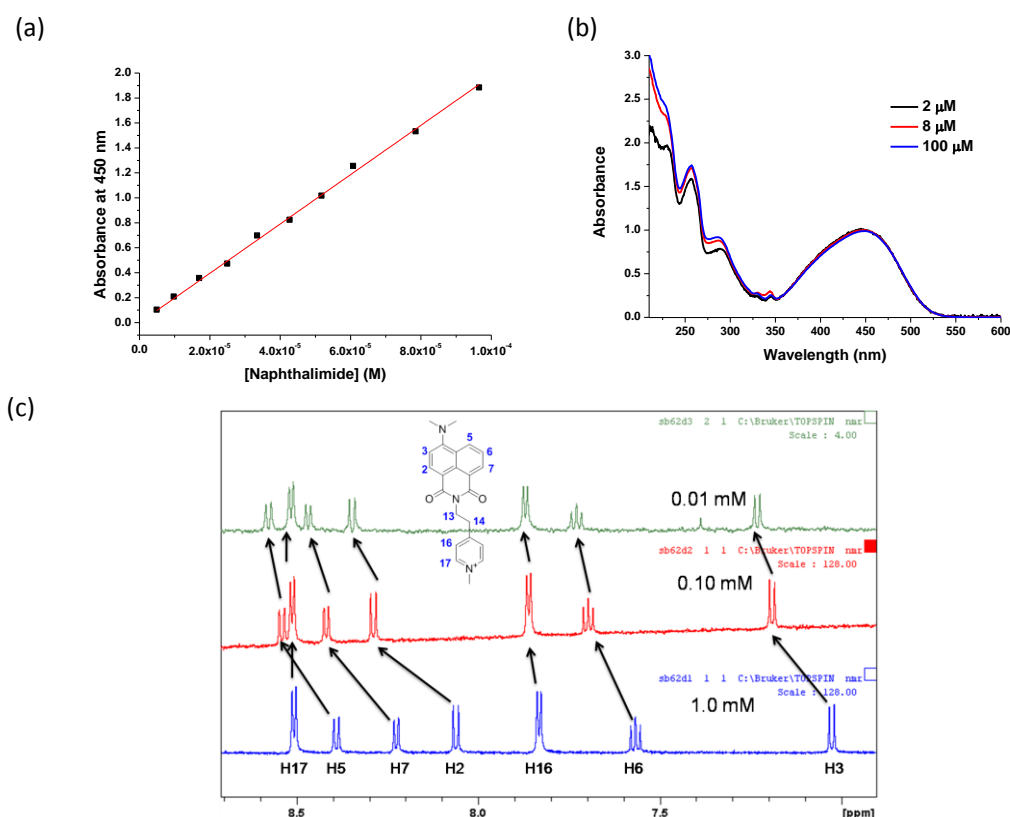

**Figure ESI 4:** (a) The plot of concentration of **3** vs. absorbance at 450 nm, (b) Normalised UV/vis absorption spectrum of **3** at various concentrations in water, (c)  $^1\text{H}$  NMR spectrum (600 MHz) of **3** in  $\text{D}_2\text{O}$  at various concentrations.

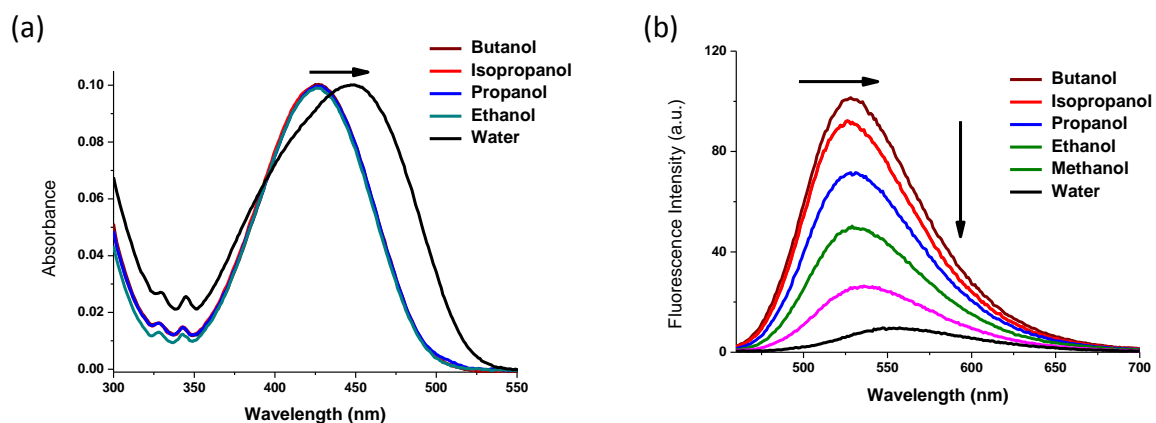

**Figure ESI 4:** Effect of solvent polarity on the (a) UV/vis and (b) fluorescence spectra of **3**.

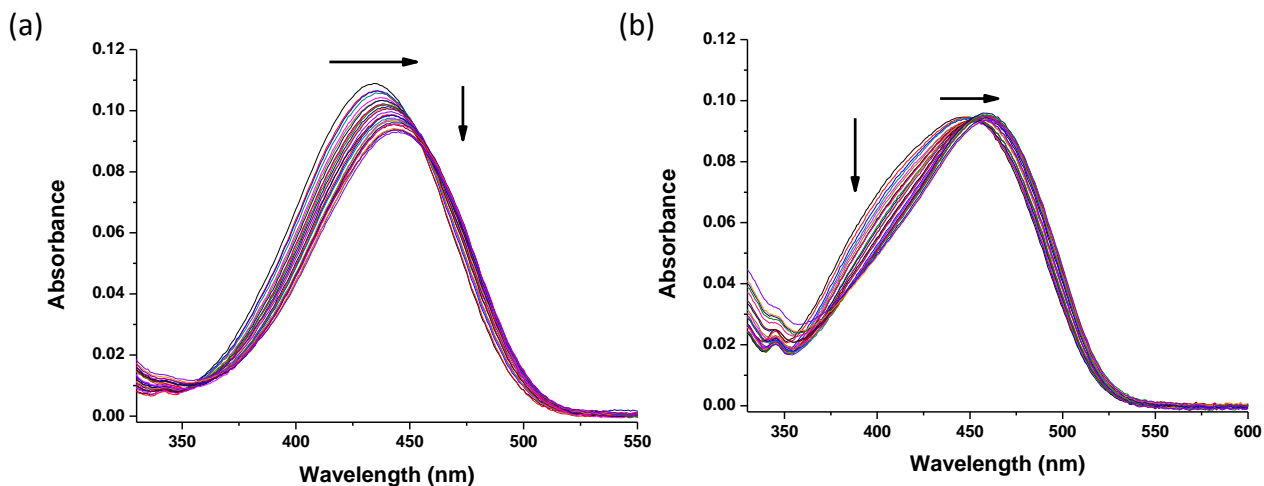

**Figure ESI 5:** The changes in the UV/vis absorption spectra of (a) **2** (6.9 μM) and **3** (7.9 μM) in the presence increasing concentration of AMP (0-100 mM) in 10 mM phosphate buffer (pH 7.0).



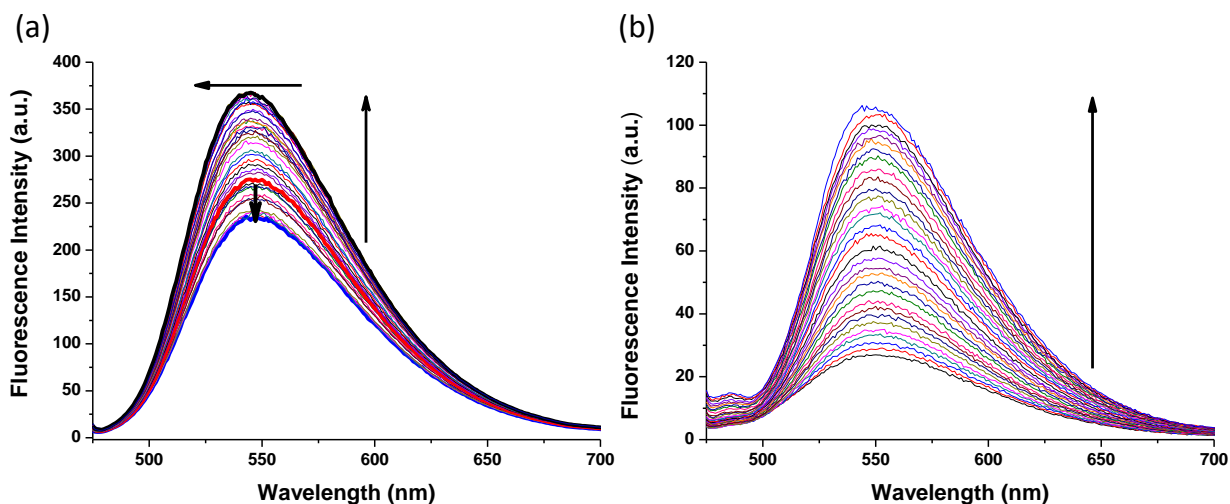

**Figure ESI 6:** The changes in the fluorescence spectra of (a) **2** (6.9 μM) (λ<sub>ex</sub> = 460 nm) and **3** (7.9 μM) (λ<sub>ex</sub> = 450 nm) in the presence of increasing concentration of AMP (0-100 mM) in 10 mM phosphate buffer (pH 7.0).

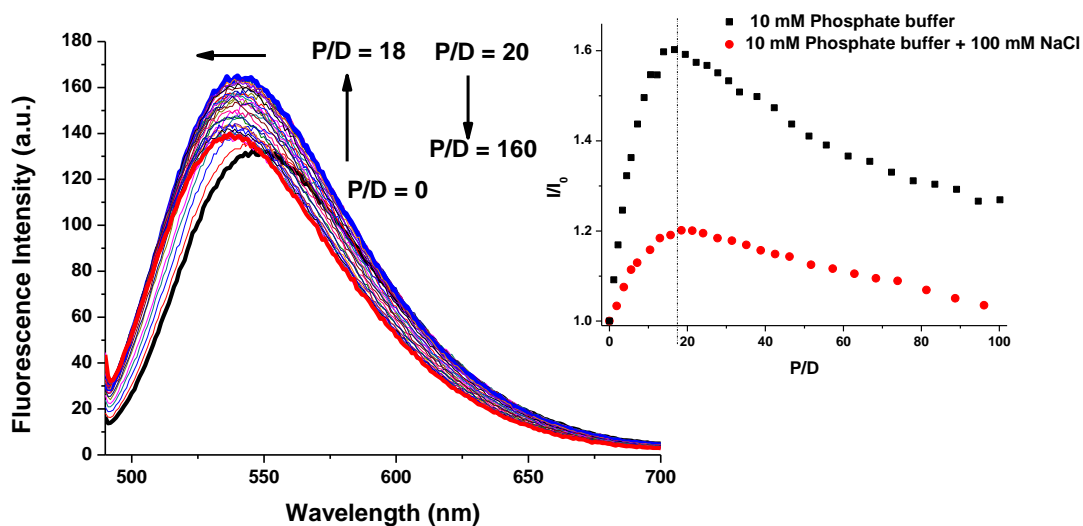

**Figure ESI 7:** Overall changes in the steady state emission spectra of **2** (7.0 μM) in the presence of increasing concentration of st-DNA (0–1120 μM) in 10 mM phosphate buffer containing 100 mM NaCl (pH 7.0) (λ<sub>ex</sub> = 480 nm). Inset: Plot of I/I<sub>0</sub> vs. P/D for **2** in 10 mM phosphate (■) and 10 mM phosphate buffer containing 100 mM NaCl (●).

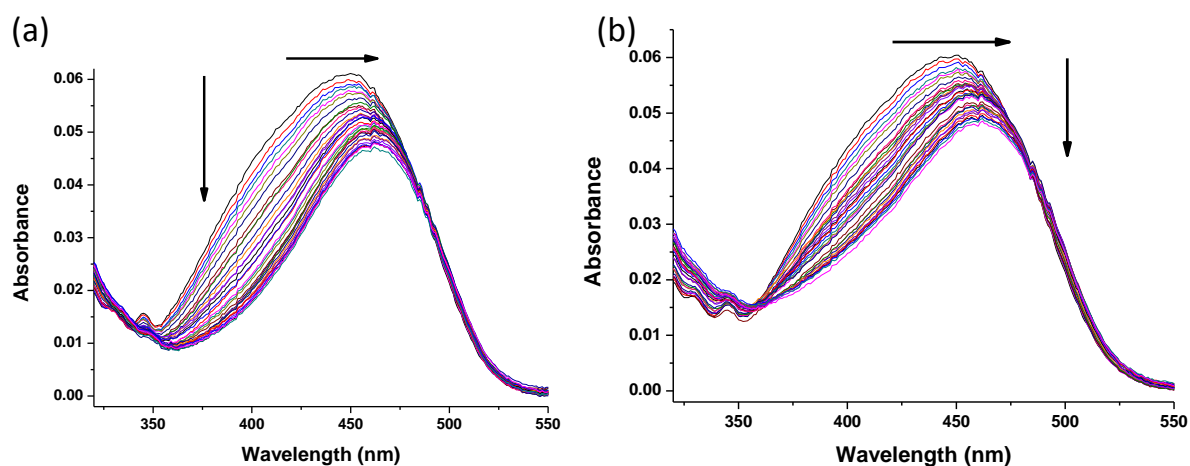

i. **Figure ESI 8:** The changes in the UV/vis absorption spectra of **3** (5.2 μM) in the presence of (a) poly (dA-dT)<sub>2</sub> (0-172 μM) and (b) poly (dG-dC)<sub>2</sub> (0-190 μM) CD in 10 mM phosphate buffer (pH 7.0).

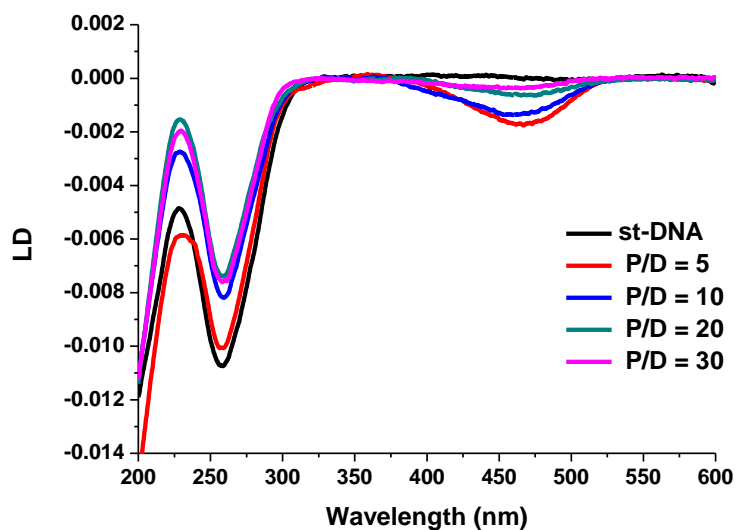

**Figure ESI 9:** The LD spectra of st-DNA (400 μM) in the presence of varying concentration of **3** (P/D 0→30) in 10 mM phosphate buffer (pH 7.0).

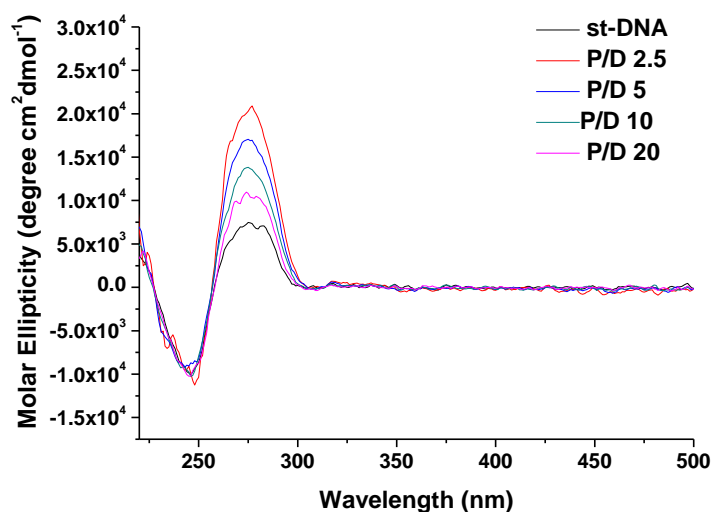

**Figure ESI 10:** The CD spectra of st-DNA (150  $\mu$ M) in the presence of varying concentration of **3** (P/D 0 $\rightarrow$ 20) in 10 mM phosphate buffer (pH 7.0).

**Table ESI 1:** Crystal data and structure refinement for **2**.

|                                       |                                                                  |                              |
|---------------------------------------|------------------------------------------------------------------|------------------------------|
| Identification code                   | sb29                                                             |                              |
| Empirical formula                     | $C_{20}H_{22}ClN_3O_4$                                           |                              |
| Formula weight                        | 403.86                                                           |                              |
| Temperature                           | 108(2) K                                                         |                              |
| Wavelength                            | 0.71073 $\text{\AA}$                                             |                              |
| Crystal system                        | Triclinic                                                        |                              |
| Space group                           | P-1                                                              |                              |
| Unit cell dimensions                  | $a = 8.1105(16) \text{\AA}$                                      | $\alpha = 98.63(3)^\circ$ .  |
|                                       | $b = 8.8677(18) \text{\AA}$                                      | $\beta = 96.32(3)^\circ$ .   |
|                                       | $c = 14.245(3) \text{\AA}$                                       | $\gamma = 110.67(3)^\circ$ . |
| Volume                                | $932.9(3) \text{\AA}^3$                                          |                              |
| Z                                     | 2                                                                |                              |
| Density (calculated)                  | $1.438 \text{ Mg/m}^3$                                           |                              |
| Absorption coefficient                | $0.238 \text{ mm}^{-1}$                                          |                              |
| F(000)                                | 424                                                              |                              |
| Crystal size                          | $0.21 \times 0.13 \times 0.08 \text{ mm}^3$                      |                              |
| Theta range for data collection       | $2.51$ to $24.99^\circ$ .                                        |                              |
| Index ranges                          | $-9 \leq h \leq 9$ , $-10 \leq k \leq 10$ , $-16 \leq l \leq 16$ |                              |
| Reflections collected                 | 10726                                                            |                              |
| Independent reflections               | 3166 [R(int) = 0.0537]                                           |                              |
| Completeness to theta = $24.99^\circ$ | 95.7 %                                                           |                              |

|                                   |                                             |
|-----------------------------------|---------------------------------------------|
| Absorption correction             | Semi-empirical from equivalents             |
| Max. and min. transmission        | 0.9812 and 0.9517                           |
| Refinement method                 | Full-matrix least-squares on F <sup>2</sup> |
| Data / restraints / parameters    | 3166 / 0 / 254                              |
| Goodness-of-fit on F <sup>2</sup> | 1.220                                       |
| Final R indices [I > 2σ(I)]       | R1 = 0.0691, wR2 = 0.1633                   |
| R indices (all data)              | R1 = 0.0730, wR2 = 0.1656                   |
| Largest diff. peak and hole       | 1.018 and -0.338 e.Å <sup>-3</sup>          |

**Table ESI 2:** Crystal data and structure refinement for **3**.

|                                 |                                                                                |                 |
|---------------------------------|--------------------------------------------------------------------------------|-----------------|
| Identification code             | sbpf6                                                                          |                 |
| Empirical formula               | C <sub>22</sub> H <sub>22</sub> F <sub>6</sub> N <sub>3</sub> O <sub>2</sub> P |                 |
| Formula weight                  | 505.40                                                                         |                 |
| Temperature                     | 100(2) K                                                                       |                 |
| Wavelength                      | 1.54178 Å                                                                      |                 |
| Crystal system                  | Triclinic                                                                      |                 |
| Space group                     | P-1                                                                            |                 |
| Unit cell dimensions            | a = 8.8081(4) Å                                                                | α = 85.580(2) ° |
|                                 | b = 9.2489(4) Å                                                                | β = 89.039(2) ° |
|                                 | c = 14.9085(6) Å                                                               | γ = 62.137(2) ° |
| Volume                          | 1070.27(8) Å <sup>3</sup>                                                      |                 |
| Z                               | 2                                                                              |                 |
| Density (calculated)            | 1.568 Mg/m <sup>3</sup>                                                        |                 |
| Absorption coefficient          | 1.866 mm <sup>-1</sup>                                                         |                 |
| F(000)                          | 520                                                                            |                 |
| Crystal size                    | 0.24 x 0.11 x 0.04 mm <sup>3</sup>                                             |                 |
| Theta range for data collection | 8.34 to 63.95°.                                                                |                 |
| Index ranges                    | -10 ≤ h ≤ 9, -10 ≤ k ≤ 10, -17 ≤ l ≤ 17                                        |                 |
| Reflections collected           | 7357                                                                           |                 |
| Independent reflections         | 3360 [R(int) = 0.0301]                                                         |                 |
| Completeness to theta = 63.95°  | 95.1 %                                                                         |                 |

|                                   |                                             |
|-----------------------------------|---------------------------------------------|
| Absorption correction             | Semi-empirical from equivalents             |
| Max. and min. transmission        | 0.7526 and 0.5895                           |
| Refinement method                 | Full-matrix least-squares on F <sup>2</sup> |
| Data / restraints / parameters    | 3360 / 0 / 310                              |
| Goodness-of-fit on F <sup>2</sup> | 1.074                                       |
| Final R indices [I > 2σ(I)]       | R1 = 0.0496, wR2 = 0.1445                   |
| R indices (all data)              | R1 = 0.0521, wR2 = 0.1468                   |
| Largest diff. peak and hole       | 0.595 and -0.358 e.Å <sup>-3</sup>          |

**Table ESI 3** Hydrogen bonds for **2** [Å and °].

| D-H...A                           | d(D-H) | d(H...A) | d(D...A) | <(DHA) |
|-----------------------------------|--------|----------|----------|--------|
| N(1)-H(1X)...O(10) <sup>a</sup>   | 0.85   | 2.05     | 2.882(4) | 166.2  |
| N(1)-H(1Y)...O(20) <sup>b</sup>   | 0.85   | 2.17     | 2.978(4) | 158.2  |
| O(10)-H(10X)...O(1) <sup>c</sup>  | 0.85   | 2.00     | 2.838(3) | 170.0  |
| O(10)-H(10Y)...Cl(1)              | 0.99   | 2.19     | 3.168(3) | 166.9  |
| O(20)-H(20X)...Cl(1)              | 0.83   | 2.33     | 3.150(3) | 170.6  |
| O(20)-H(20Y)...Cl(1) <sup>d</sup> | 0.97   | 2.21     | 3.167(3) | 168.2  |

*Symmetry transformations used to generate equivalent atoms:*

<sup>a</sup> -x, -y, -z    <sup>b</sup> x-1, y-1, z-1    <sup>c</sup> x, y+1, z    <sup>d</sup> -x+2, -y+2, -z+1
